# Supplementary material for: Biotransformation of benzo[a]pyrene by Pannonibacter sp. JPA3 and the degradation mechanism through the initially oxidized benzo[a]pyrene-4,5-dihydrodiol to downstream metabolites
Source: Royal Society of Chemistry journal article supplement (doi:10.1039/d3ra01453c), 2023-01-01
Supplement: d3ra01453c1.pdf [file d3ra01453c1.pdf]

**Biotransformation of benzo[a]pyrene by *Pannonibacter* sp. JPA3 and the degradation mechanism research through the initially oxidized benzo[a]pyrene-4,5-dihydrodiol to downstream metabolites**

Jingnan Jin<sup>a,\*</sup>, Yahui Shi<sup>a</sup>, Baozhong Zhang<sup>a</sup>, Dongjin Wan<sup>a</sup>, Qingye Zhang<sup>b</sup>, Ying Li<sup>a</sup>

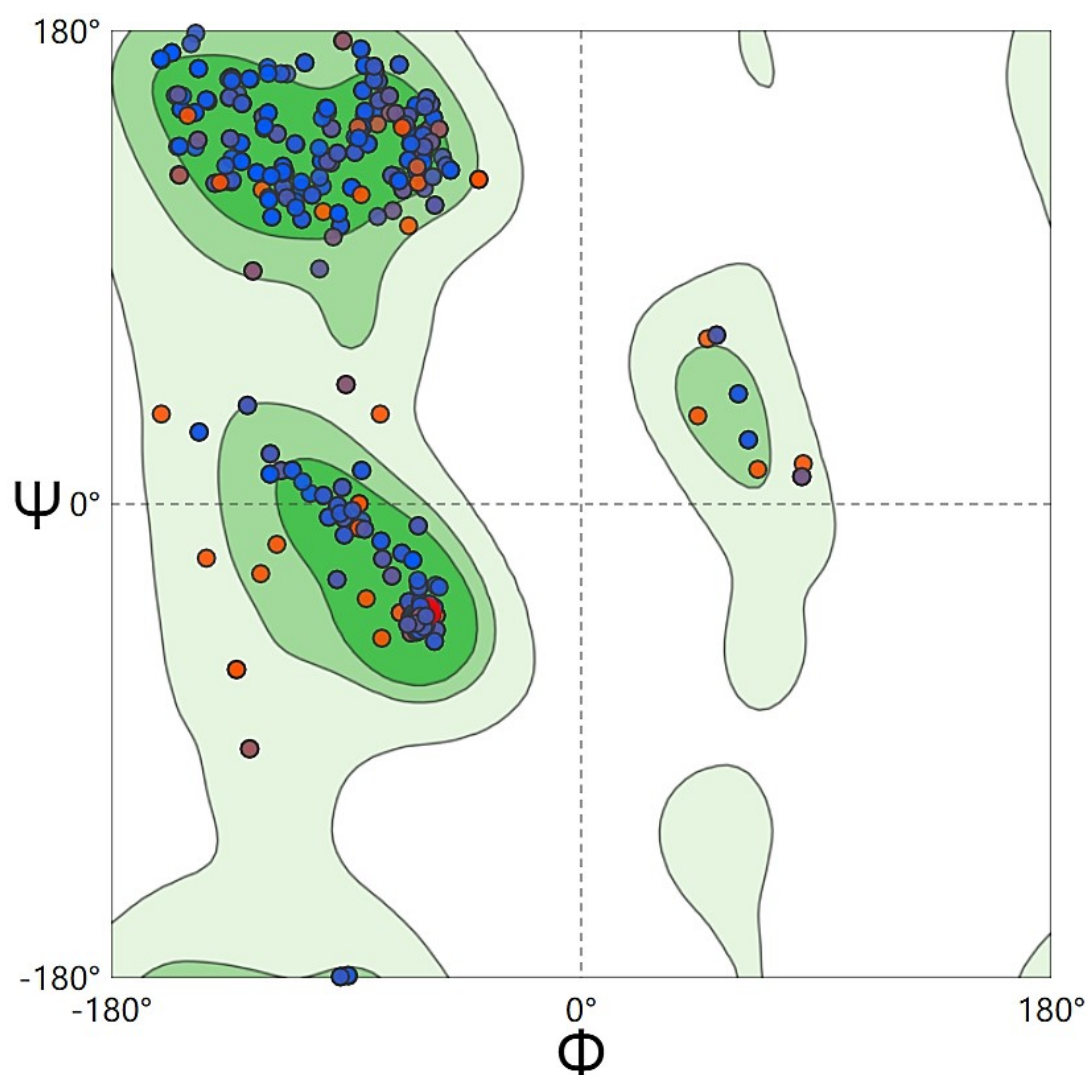

**Fig. S1.** The Ramachandran Plots of modeling structure of target enzyme in the strain.

**Table S1**

The constitution of the mineral salt medium.

| Elements                                             | Concentration |
|------------------------------------------------------|---------------|
| $\text{KH}_2\text{PO}_4$                             | 0.50 g/L      |
| $\text{Na}_2\text{HPO}_4 \cdot 12\text{H}_2\text{O}$ | 1.26 g/L      |
| $(\text{NH}_4)_2\text{SO}_4$                         | 3.00 g/L      |
| $\text{MgSO}_4 \cdot 7\text{H}_2\text{O}$            | 0.54 g/L      |
| $\text{MnSO}_4 \cdot \text{H}_2\text{O}$             | 0.15 mg/L     |
| $\text{FeCl}_3 \cdot 6\text{H}_2\text{O}$            | 0.50 mg/L     |
| $\text{ZnSO}_4 \cdot 7\text{H}_2\text{O}$            | 0.24 mg/L     |
| $\text{CoCl}_2 \cdot 6\text{H}_2\text{O}$            | 3.66 mg/L     |
| $\text{FeSO}_4 \cdot 7\text{H}_2\text{O}$            | 0.30 mg/L     |

**Table S2**

Amplification system of of 16S rDNA

| Elements           | Concentration       |
|--------------------|---------------------|
| 2×Taq MasterMix    | 12.50 $\mu\text{L}$ |
| each primer        | 1.00 $\mu\text{L}$  |
| genomic DNA        | 0.50 $\mu\text{L}$  |
| ddH <sub>2</sub> O | 10.00 $\mu\text{L}$ |

**Table S3**

The amplification program of 16S rDNA.

| Temperature    | Time   |
|----------------|--------|
| 94 °C          | 1 min  |
| 94 °C          | 1 min  |
| 30 times 54 °C | 1 min  |
| 72 °C          | 1 min  |
| 72 °C          | 10 min |

**Table S4**

Parameters of HP-5 chromatogram column.

| Elements                   | Concentration                                         |
|----------------------------|-------------------------------------------------------|
| Carrier gas                | 40 $\text{cm s}^{-1}$                                 |
| Column temperature         | 60 °C for 1 min<br>320 °C for 10 °C $\text{min}^{-1}$ |
| Electron ionization energy | 70 eV                                                 |
| Ion source temperature     | 230 °C                                                |

**Table S5**

Procedure of PCR amplification for dioxygenase gene.

| Temperature | Time                    |
|-------------|-------------------------|
| 95 °C       | 1 min                   |
| 30 times    | 95 °C<br>55 °C<br>72 °C |
| 72 °C       | 10 min                  |
